# Supplementary material for: Phenotypic Plasticity Strategy of Aeluropus lagopoides Grass in Response to Heterogenous Saline Habitats
Source: MDPI journal article supplement (doi:10.3390/biology12040553), 2023-04-05
Supplement: s1 [file s1]

## Article

# Phenotypic Plasticity Strategy of *Aeluropus lagopoides* Grass in Response to Heterogenous Saline Habitats

Abdulaziz M. Assaeed, Basharat A. Dar, Abdullah A. Al-Doss, Saud L. Al-Rowaily, Jahangir A. Malik and Ahmed M. Abd-ElGawad \*

Plant Production Department, College of Food and Agriculture Sciences, King Saud University, Riyadh 11451, Saudi Arabia

\* Correspondence: aibrahim2@ksu.edu.sa; Tel.: +966-5626-80864

**Citation:** Assaeed, A.M.; Dar, B.A.; Al-Doss, A.A.; Al-Rowaily, S.L.; Malik, J.A.; Abd-ElGawad, A.M. Phenotypic Plasticity Strategy of *Aeluropus lagopoides* Grass in Response to Heterogenous Saline Habitats. *Biology* **2023**, *12*, 553. <https://doi.org/10.3390/biology12040553>

Academic Editors: Daniel Puppe, Panayiotis Dimitrakopoulos, Baorong Lu and Caifu Jiang

Received: 23 February 2023

Revised: 28 March 2023

Accepted: 3 April 2023

Published: 5 April 2023

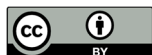

**Copyright:** © 2023 by the authors. Submitted for possible open access publication under the terms and conditions of the Creative Commons Attribution (CC BY) license (<https://creativecommons.org/licenses/by/4.0/>).

## Supplementary Materials

**Table S1.** Geographical addresses of distinct patches of *A. lagopoides* populations of the studied regions of Saudi Arabia along with yearly climatic data.

| Region    | Location                                                               | Patch No. | Coordinates |            | Elevation<br>m a.s.l | Min.<br>Temp<br>(°C) | Max.<br>Temp<br>(°C) | Yearly          |                  |
|-----------|------------------------------------------------------------------------|-----------|-------------|------------|----------------------|----------------------|----------------------|-----------------|------------------|
|           |                                                                        |           | N           | E          |                      |                      |                      | Humidity<br>(%) | Rainfall<br>(mm) |
| Al-Jouf   | Inland saline flat region in Domat Aljandal                            | 1         | 29°49.200   | 039°58.393 | 565                  | 14.23                | 28.42                | 29.75           | 3.58             |
|           |                                                                        | 2         | 29°49.270   | 039°58.457 | 563                  |                      |                      |                 |                  |
|           |                                                                        | 3         | 29°49.850   | 039°58.931 | 558                  |                      |                      |                 |                  |
|           |                                                                        | 4         | 29°49.085   | 039°58.149 | 519                  |                      |                      |                 |                  |
|           |                                                                        | 5         | 29°49.169   | 039°57.494 | 525                  |                      |                      |                 |                  |
| Jizan     | Coastal saline flat region on the Southern Coastal Region              | 1         | 16°58.102   | 042°33.849 | 15                   | 27.23                | 32.51                | 69.67           | 12.67            |
|           |                                                                        | 2         | 16°58.122   | 042°33.707 | 9                    |                      |                      |                 |                  |
|           |                                                                        | 3         | 16°58.137   | 042°33.667 | 6                    |                      |                      |                 |                  |
|           |                                                                        | 4         | 16°58.144   | 042°34.082 | 4                    |                      |                      |                 |                  |
|           |                                                                        | 5         | 16°58.114   | 042°34.016 | 4                    |                      |                      |                 |                  |
| Salwa     | Coastal saline flat region as lowland on the coast of the Arabian Gulf | 1         | 24°45.392   | 050°45.225 | -10                  | 19.35                | 34.25                | 29.92           | 6.08             |
|           |                                                                        | 2         | 25°43.664   | 050°08.274 | -9                   |                      |                      |                 |                  |
|           |                                                                        | 3         | 25°43.759   | 050°08.045 | -8                   |                      |                      |                 |                  |
|           |                                                                        | 4         | 24°45.071   | 050°45.348 | -11                  |                      |                      |                 |                  |
|           |                                                                        | 5         | 25°43.664   | 050°08.274 | -9                   |                      |                      |                 |                  |
| Riyadh    | Inland saline flat region in wadi Hargan, Qareenah                     | 1         | 25°03.995   | 046°10.795 | 833                  | 18.50                | 32.70                | 22.75           | 5.50             |
|           |                                                                        | 2         | 25°03.975   | 046°10.802 | 824                  |                      |                      |                 |                  |
|           |                                                                        | 3         | 25°03.944   | 046°10.824 | 816                  |                      |                      |                 |                  |
|           |                                                                        | 4         | 25°03.923   | 046°10.852 | 812                  |                      |                      |                 |                  |
|           |                                                                        | 5         | 25°03.890   | 046°10.897 | 810                  |                      |                      |                 |                  |
| Al-Qassim | Inland saline flat region of the Al-Aushazia location                  | 1         | 26°03.295   | 44°08.168  | 590                  | 17.31                | 32.22                | 24.33           | 7.75             |
|           |                                                                        | 2         | 26°03.309   | 44°08.253  | 654                  |                      |                      |                 |                  |
|           |                                                                        | 3         | 26°03.236   | 044°08.220 | 621                  |                      |                      |                 |                  |
|           |                                                                        | 4         | 26°03.770   | 044°08.272 | 603                  |                      |                      |                 |                  |
|           |                                                                        | 5         | 26°03.351   | 044°08.144 | 595                  |                      |                      |                 |                  |

Note:- N: Latitude; E: Longitude; m a.s.l : meter above sea level; Min: minimum Temp: Temperature; Max: Maximum and mm: millimeter. The data source for the yearly climate of the studied region had been taken from Climate data calculated by climate-data.org (Climate Saudi Arabia: Average Temperature, Weather by year & Weather for Saudi Arabia - Climate-Data.org).

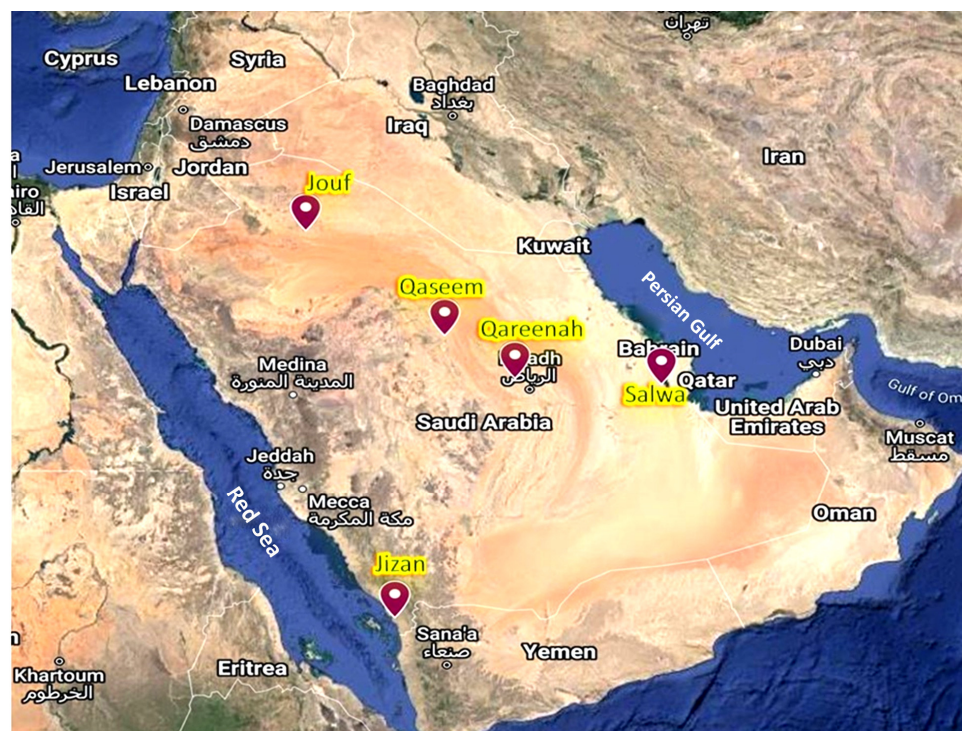

**Figure S1.** Map of Saudi Arabia showing sampled regions of *Aeluropus lagopoides* populations. The map is derived from Google Earth Pro, NVIDIA Corporation.

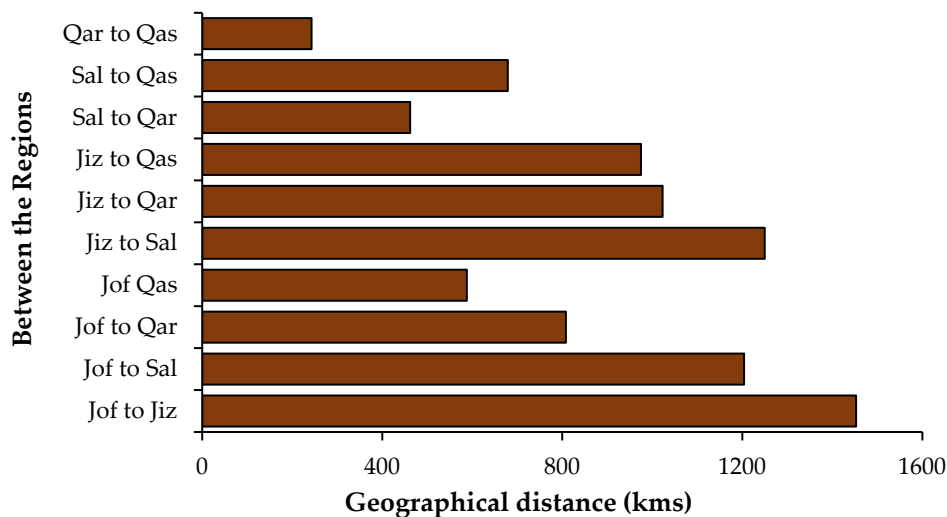

**Figure S2.** Pairwise geographical distance between the studied regions. Qar: Qareenah; Qas: Qaseem; Sal: Salwa; Jiz: Jizan and Jof: Jof

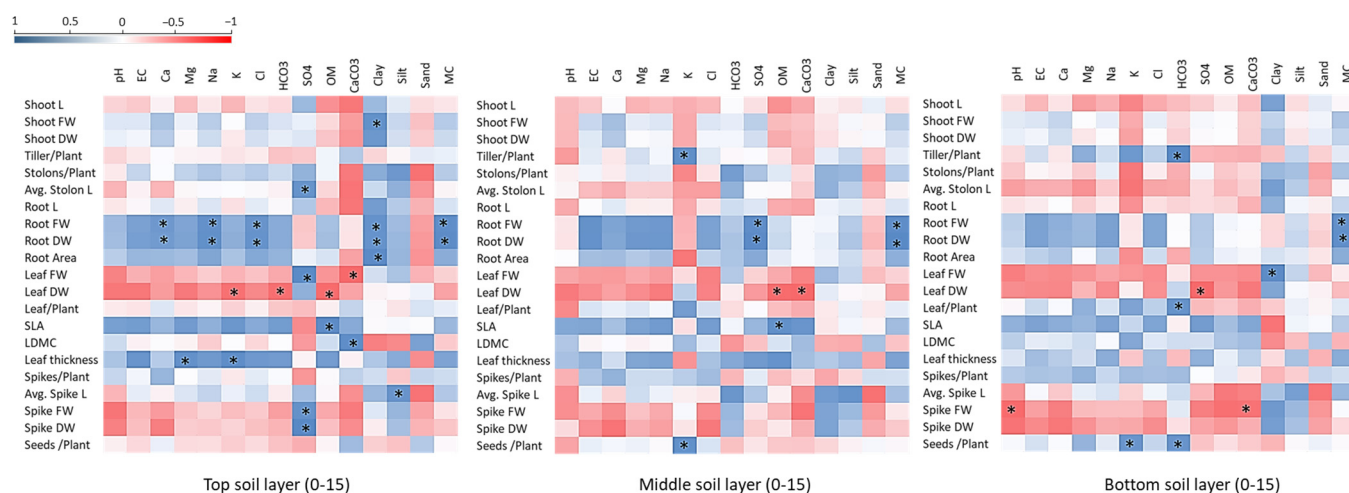

**Figure S3.** Pearson's Correlation heatmap between the soil parameters of the top, middle, and bottom layer and the different morphological and reproductive traits of *Aeluropus lagopoides* within different saline flat regions. \* showed significant correlation values.
